# Supplementary material for: Lignin-derived 3D porous graphene on carbon cloth for flexible supercapacitors
Source: Royal Society of Chemistry journal article supplement (doi:10.1039/d1ra01754c), 2021-01-01
Supplement: d1ra01754c1.pdf [file d1ra01754c1.pdf]

Lignin-derived 3D porous graphene on carbon cloth for flexible supercapacitors

**Xinzhi Sun<sup>a</sup>, Hong Jin<sup>b</sup>, Wangda Qu<sup>\*c</sup>**

a. College of Chemistry and Pharmaceutical Sciences, Qingdao Agricultural University,  
Qingdao 266109, China

b. Xi'an Jiaotong University Suzhou Academy, Suzhou 215123, China

c. College of Life Sciences, Qingdao Agricultural University, Qingdao 266109, China

Correspondence to: Wangda Qu (E-mail: [wqu@qau.edu.cn](mailto:wqu@qau.edu.cn))

**Supplementals**

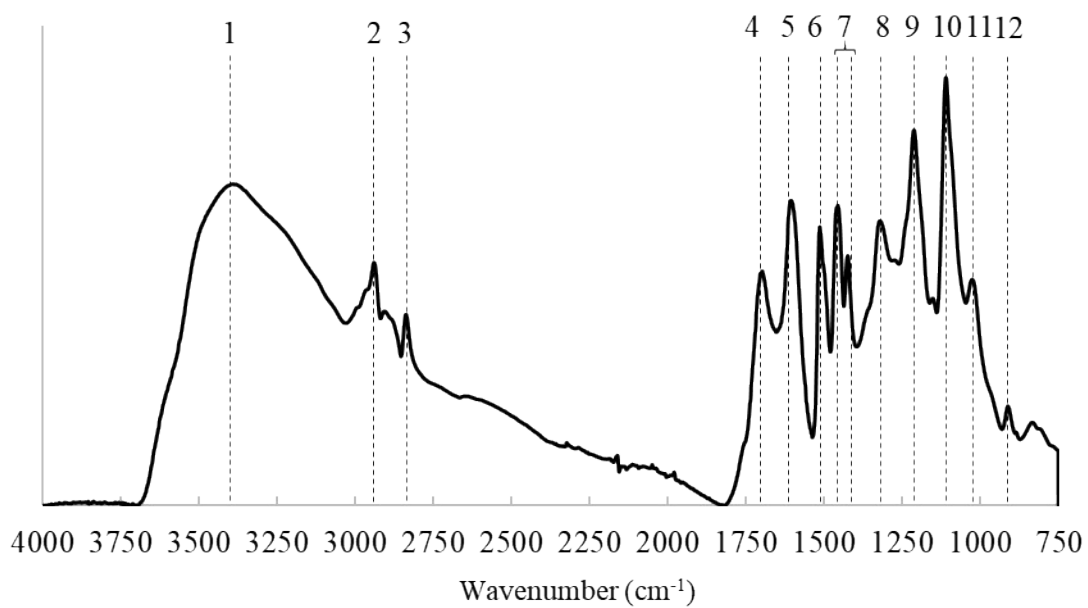

Figure S1. FTIR spectrum of lignin used in this study (Assignments 1: OH, 2/3: C-H in methylene and methyl group, 4: C=O, 5: G-condensed, 6: Aromatic skelton vibrations, 7: C-H deformations, 8: Condensed S and G ring, 9: C-C+C-O+C=O, 10: C=O, 11: primary alcohols, 12: CH<sub>2</sub> wagging).

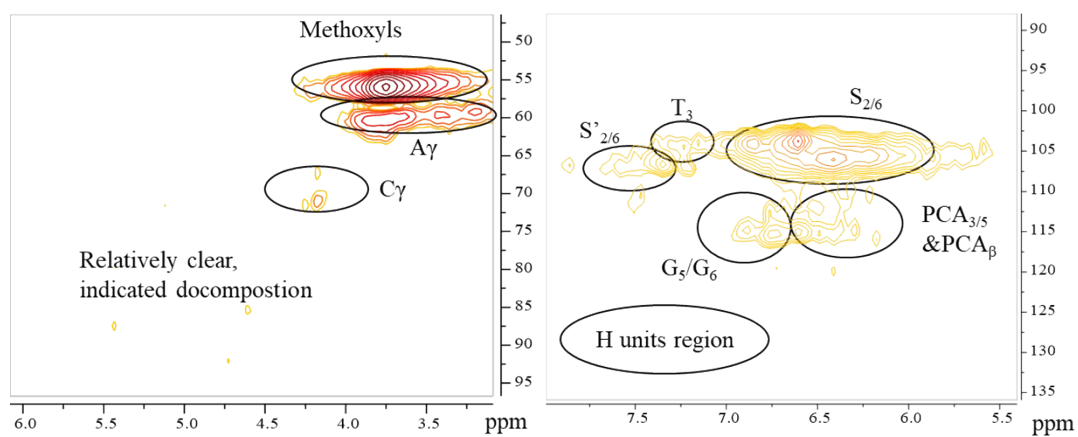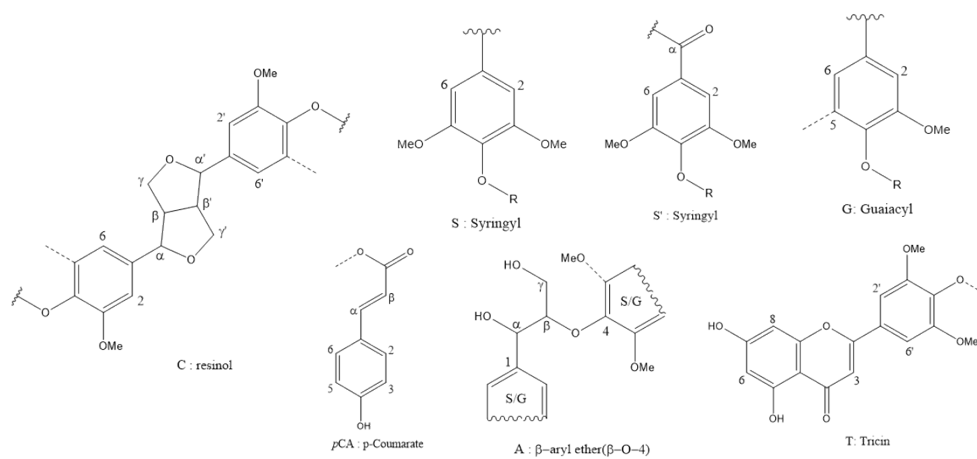

Figure S2.  $^1\text{H}$ - $^{13}\text{C}$  HSQC NMR spectra of the lignin.

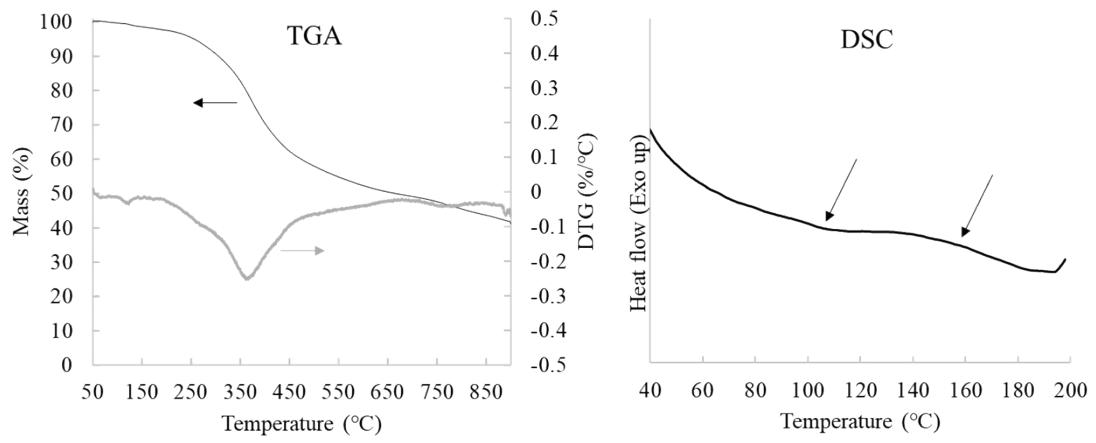

Figure S3. TGA and DSC curves of the lignin.

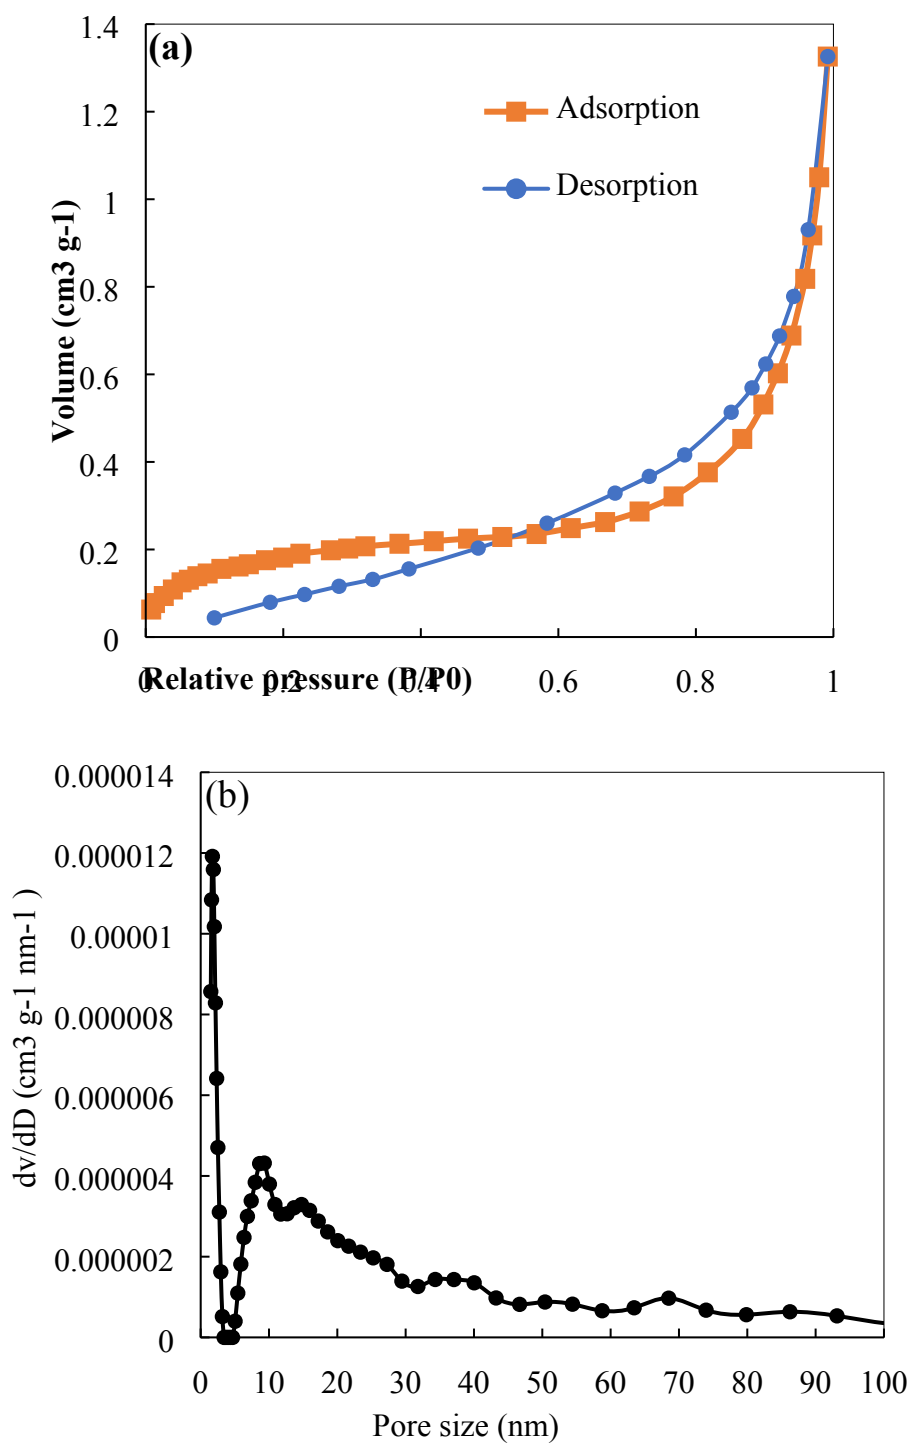

Figure S4. (a) N<sub>2</sub> adsorption/desorption isotherms (77 K) of LLC electrodes (b) pore size distribution for N<sub>2</sub> adsorption (NLDFIT model).

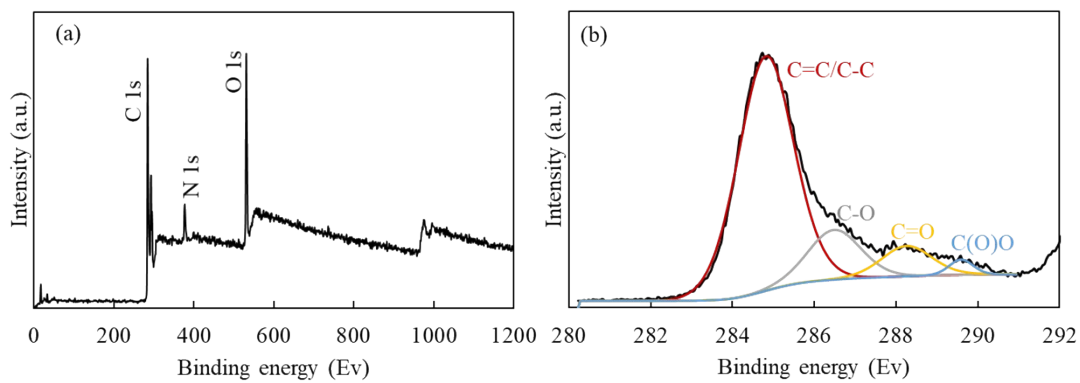

Figure S5. XPS spectrum of LLC.

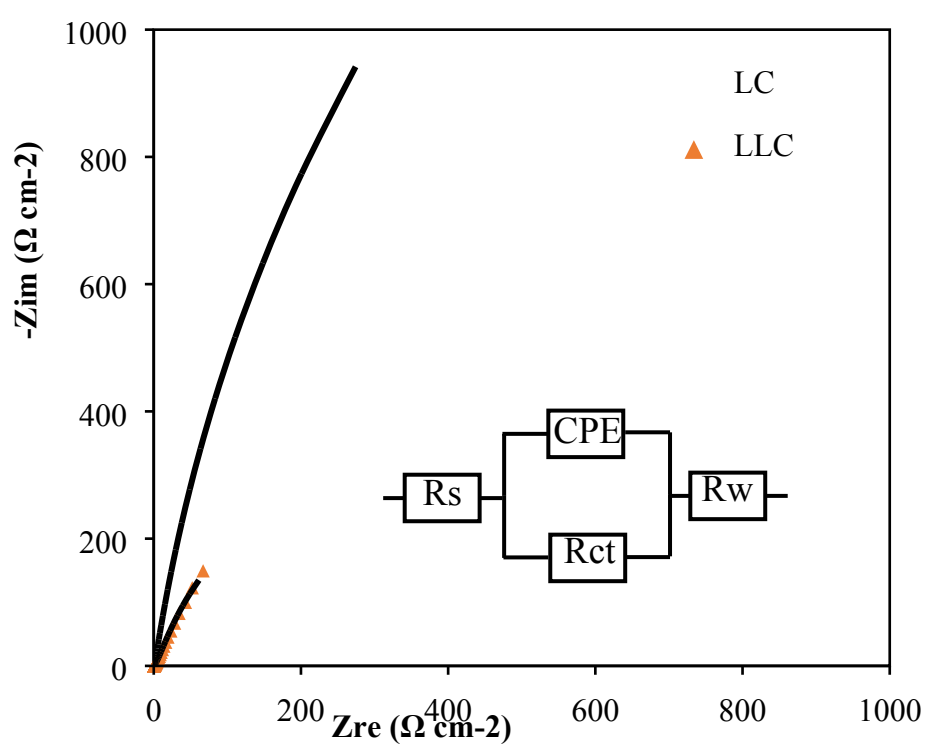

Figure S6. Nyquist plots for LC and LLC in three-electrode system.

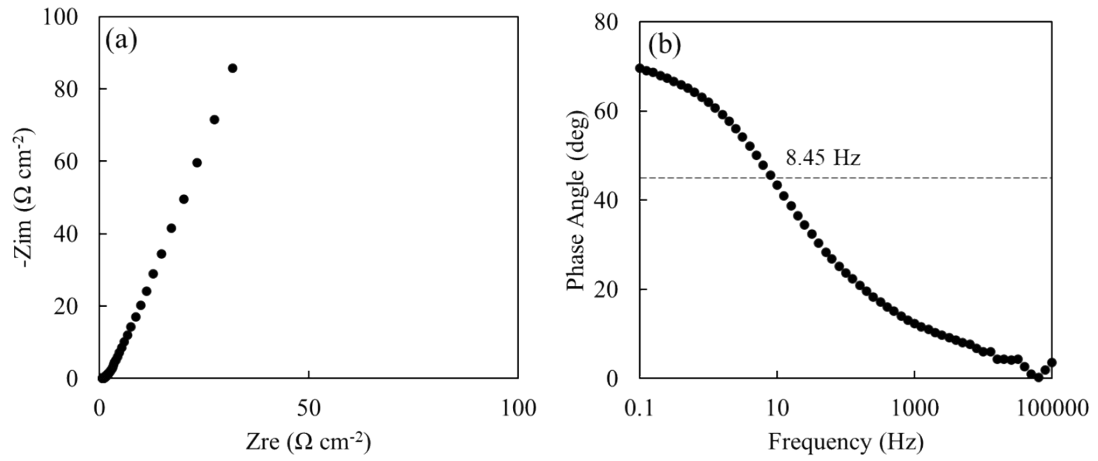

Figure S7. (a) Nyquist plot and (b) Bode phase angle plot for LLC symmetric supercapacitors.

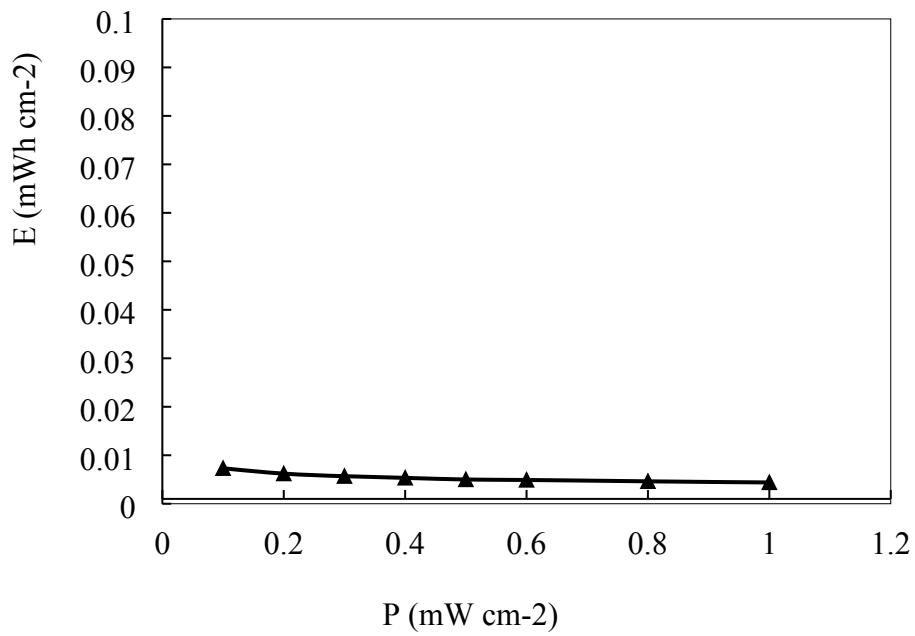

Figure S8. Ragone plot of LLC symmetric supercapacitors.

Table S1. Comparison of the areal capacitances for LLC device with other lignin-based DLW-derived carbons reported in the literature.

| Carbon source       | Current Density<br>(mA cm <sup>-2</sup> ) | C <sub>A</sub> (mF cm <sup>-2</sup> ) | Electrolyte                                     | Reference |
|---------------------|-------------------------------------------|---------------------------------------|-------------------------------------------------|-----------|
| Lignin/PVA          | 0.05                                      | 25.1                                  | 1M H <sub>2</sub> SO <sub>4</sub> gel           | [1]       |
| Lignin/PEO          | 0.1                                       | 25.44                                 | 1M H <sub>2</sub> SO <sub>4</sub> gel           | [2]       |
| Lignin/PEO          | 0.01                                      | 2.51                                  | 1M H <sub>2</sub> SO <sub>4</sub> gel           | [3]       |
| Lignin/PAN/MOS<br>2 | 0.1                                       | 16.2                                  | 1M H <sub>2</sub> SO <sub>4</sub> gel           | [4]       |
| Lignin only         | 0.1                                       | 52.8<br>41.3                          | 6M KOH<br>1M H <sub>2</sub> SO <sub>4</sub> gel | This work |

#### Reference

- 1 W. Zhang, Y. Lei, F. Ming, Q. Jiang, P. M. F. J. Costa and H. N. Alshareef, *Adv. Energy Mater.*, 2018, **8**, 1801840.
- 2 F. Mahmood, C. Zhang, Y. Xie, D. Stalla, J. Lin and C. Wan, *RSC Adv.*, 2019, **9**, 22713–22720.
- 3 F. Mahmood, F. Mahmood, H. Zhang, J. Lin and C. Wan, *ACS Omega*, 2020, **5**, 14611–14618.
- 4 S. Wang, Y. Yu, S. Luo, X. Cheng, G. Feng, Y. Zhang, Z. Wu, G. Compagnini, J. Pooran and A. Hu, *Appl. Phys. Lett.*, 2019, **115**, 083904.
